# Supplementary material for: Spatially periodic computation in the entorhinal-hippocampal circuit during navigation
Source: eLife. 2026 Feb 17;14:RP107517. doi: 10.7554/eLife.107517 (PMC12912724; doi:10.7554/eLife.107517)
Supplement: Figure 2—source data 1. [file elife-107517-fig2-data1.xlsx]

## Sheet: Sheet1
Figure 2-source data 1
Related to Figure 2C
Each row represents a participant, and each column represents #-fold modulation.
-0.3366	-0.4065	-0.0481	0.5892	1.4059
0.2839	0.3431	0.6595	-0.2964	0.0451
0.8775	-1.4097	0.2067	0.7702	-0.7211
-0.3172	-0.4176	-0.3109	-0.2541	0.5182
-0.1782	-0.1961	-0.1215	0.7795	-0.0007
-0.1576	1.3496	0.7323	-0.5467	-1.0152
0.7804	-0.599	-0.0884	1.1206	0.3793
-0.0837	0.7997	0.068	0.0771	0.4324
0.4304	2.084	-0.3892	0.4476	0.0843
0.0954	0.8422	0.1769	0.2096	-1.0837
0.2619	-0.1201	-1.0546	0.7733	0.1527
-0.2762	0.3435	-1.1577	0.5132	0.1729
-0.072	1.3079	0.1881	1.8298	-0.7457
-0.2468	0.6354	0.7468	1.7343	-0.045
-0.5398	0.3912	0.7951	0.8653	1.332
-0.5292	-0.265	-0.2611	-0.0526	0.248
0.9022	-0.4621	-0.1506	0.4084	0.216
1.6198	1.5229	0.4152	-0.9352	1.3376
-0.3605	-1.2854	-0.4083	0.6195	0.2107
0.9507	-0.3601	0.7922	0.5684	-1.0786
0.0574	0.149	-0.1007	2.4078	-0.3787
0.3574	0.4136	-0.5563	-0.4389	-0.6215
0.453	-0.4858	0.7278	-0.1086	0.2258
-1.0516	-1.0147	-0.1681	0.6666	0.4581
0.2137	-1.4494	-2.2349	0.4617	0.6704
0.7239	-0.5698	1.208	0.2291	-0.6771
-1.2671	0.9975	0.4521	1.1197	1.1149
-0.2625	-0.0259	-0.7667	-0.3099	0.323
-0.9796	-0.155	-0.1186	0.2864	-0.2912
0.0308	-0.1988	-0.1045	0.1791	0.5299
1.0277	-0.44	-0.3396	-0.2424	0.0153
0.8044	0.9706	-1.4161	0.7571	1.5398
0.6966	-1.1767	1.2374	0.6384	-1.278
