# Supplementary material for: Spatially periodic computation in the entorhinal-hippocampal circuit during navigation
Source: eLife. 2026 Feb 17;14:RP107517. doi: 10.7554/eLife.107517 (PMC12912724; doi:10.7554/eLife.107517)
Supplement: Figure 2—source data 2. [file elife-107517-fig2-data2.xlsx]

## Sheet: Sheet1
Figure 2-source data 2
Related to Figure 2D
Each row represents a participant, and each column corresponds to a spatial direction from 0° to 360°, divided into 12 bins.
-0.5834	-1.0146	0.0219	1.7863	0.0517	-0.0622	1.7952	-0.0287	-0.6777	-0.9715	-0.7948	0.2379
-0.5292	0.429	-0.3127	0.4866	-0.4117	0.3869	-0.2898	0.3872	-0.4968	0.4045	-0.3078	0.2096
-0.2934	-0.5693	-0.2653	0.9669	-0.2705	0.2405	-0.9234	0.8284	-1.0496	0.7529	-0.9324	0.3085
-0.7119	-0.8127	0.4389	-0.5631	-0.328	-0.0676	2.0726	0.6127	-0.4388	-0.6298	0.3536	-0.1041
-0.5092	1.085	-0.9791	0.9926	-1.0162	1.0325	-0.8876	0.7883	-0.8174	0.7167	-1.2664	0.5025
3.1723	0.991	-0.2364	-1.4259	2.149	-2.2009	0.3852	-0.7385	0.9627	-1.0761	1.4393	-1.5885
0.7538	-1.6254	1.6661	-1.4918	0.7661	-1.4014	0.8072	-2.1823	0.0787	-0.659	1.6302	-0.712
-0.0153	0.6298	-0.0473	0.3842	-0.0104	-0.9295	-0.5532	-0.6017	0.1325	0.0185	-0.2869	0.2461
0.5562	-1.0015	0.5086	-0.679	0.4206	-0.2034	0.5309	-1.0414	0.7291	-0.8221	0.6919	0.124
-0.0126	0.4919	-0.1925	0.2999	-0.5203	0.6763	-0.3128	0.1961	-0.3975	0.2373	-0.574	-0.1032
-2.2308	1.9693	-1.9031	1.3292	-0.5267	1.098	-0.6091	1.719	-2.3791	1.7536	-2.1742	0.9941
0.3797	-0.4873	0.4557	-1.0688	-0.6852	0.3164	0.5297	-0.1589	-0.1419	-1.4174	1.1607	-1.067
2.9017	-6.4946	3.4142	-2.7441	2.0929	-1.482	2.7932	-3.5461	2.8015	-2.6833	3.1207	-0.8909
-3.6358	1.0494	0.5352	0.4322	1.4075	2.4325	1.4969	-1.6294	0.4657	-1.023	-2.4293	0.9814
-1.4365	-0.486	0.1291	1.8555	0.5123	0.5864	0.0726	0.3285	0.1813	-0.3321	0.2246	0.4576
0.2673	0.4908	0.7354	0.1845	0.8127	0.244	-0.6263	-0.226	0.2014	0.6637	0.4393	-0.3018
0.8925	-0.9168	0.7562	-0.3927	0.37	-0.7631	0.0693	-0.0983	-0.3941	-0.7847	-0.8119	-0.8716
0.6358	-0.8507	-0.0386	0.077	-0.4318	2.4465	1.0184	-0.2922	-3.0698	0.4147	-2.7643	1.3641
2.5549	-0.7737	2.295	-0.6044	0.6201	-0.4376	1.8552	0.1933	0.3925	0.6001	1.5307	-1.6199
-0.297	-0.5304	-1.1993	-1.07	-0.4583	-1.6195	0.6584	0.4071	0.9399	0.7103	1.4621	0.1823
3.9319	-3.9587	5.9456	-3.9704	6.3853	-5.4991	2.4817	-5.9615	5.7534	-3.2054	6.6756	-3.0433
-0.1419	-0.0504	-0.4127	-1.319	0.5211	-0.8571	0.0649	-1.118	0.5781	0.507	-0.6584	0.1047
-0.0475	0.3495	-0.0135	-0.4928	0.2195	0.0769	-0.0978	-0.3489	-0.4261	0.6341	0.4514	0.1487
0.5755	-0.9772	0.9767	-0.6362	0.7599	-1.0824	0.5716	-0.6408	0.9182	-0.9963	0.6196	-0.3047
-1.0048	0.4491	-0.9064	0.3909	-0.0808	0.6235	-0.4836	0.8014	0.1188	-0.959	-0.6141	0.0533
-0.4381	-0.0316	-0.3284	0.2937	-0.2839	0.4437	-0.3806	0.0546	-0.1726	0.2633	-0.1929	-0.6101
-1.2005	1.0838	-1.9373	1.1955	-1.5276	1.3843	-1.6439	2.0146	-1.9656	1.6866	-0.9901	-0.0537
0.9737	1.388	-0.0556	0.0825	-1.7451	-1.0201	-0.4684	-1.5621	-0.4809	-0.5532	-1.473	0.7561
0.438	-0.0105	0.1583	-0.2594	0.4694	-0.1739	0.13	-0.2607	0.0646	-0.1292	0.1564	-0.2228
-1.3493	0.1172	-0.2483	0.2725	0.1756	0.3228	-1.0896	0.5161	0.1792	-0.1891	-0.2885	0.0716
0.0646	0.0942	-0.8988	0.3029	-0.8196	0.3802	-1.0989	-0.4345	0.0098	-0.4379	-0.4335	0.1499
-0.9807	-0.616	0.391	-0.2502	0.263	-0.8828	1.0533	0.2887	-0.2424	-0.7445	1.2518	-0.2616
0.4135	1.5567	-1.1644	1.0624	-1.2744	0.2836	-0.8071	0.2152	-0.6546	0.9941	-0.8398	0.0285
