# Supplementary material for: Spatially periodic computation in the entorhinal-hippocampal circuit during navigation
Source: eLife. 2026 Feb 17;14:RP107517. doi: 10.7554/eLife.107517 (PMC12912724; doi:10.7554/eLife.107517)
Supplement: Figure 3—source data 1. [file elife-107517-fig3-data1.xlsx]

## Sheet: Sheet1
Figure 3-source data 1
Related to Figure 3E
Each row represents a participant, and each column represents #-fold modulation.
0.3639	-0.2316	-0.3351	0.6524	0.6297
-0.1875	-0.1727	0.1821	0.6814	0.8152
0.1642	-0.3415	-0.2157	0.0112	0.6583
0.2635	0.0999	-0.4517	-0.623	-0.3988
-0.3112	-1.2992	0.0253	0.5945	0.3053
0.9921	1.1033	0.6605	-0.6244	-0.0679
0.5506	0.8579	0.9431	1.3872	-0.3826
-0.6134	0.3413	-0.0849	0.1239	0.0403
0.2992	0.6268	0.3132	-0.4099	0.0346
-0.0642	-0.0181	0.361	0.5535	-0.0956
1.3924	-0.157	-0.9441	1.1565	-0.2424
0.6896	0.3475	0.0088	-0.1439	0.3873
-0.131	1.0263	0.834	0.5967	-0.6745
0.8536	-0.1166	0.5822	0.107	0.3706
0.7204	0.178	-0.0556	0.2237	0.4838
-0.2529	0.2055	-1.1446	-0.9806	-0.2401
0.5898	-0.279	-1.0987	-0.0677	-0.3616
1.0268	-0.7295	0.6167	-1.0221	0.4154
0.132	0.4497	0.5541	0.3025	-0.7083
1.5905	-0.3811	-0.1103	0.0898	-0.5335
-0.2455	-0.1235	-0.179	0.5874	1.738
0.6526	0.715	-0.1425	0.4298	-0.659
0.9484	0.9568	0.3202	0.4016	1.2807
0.8417	-1.0313	-0.1349	1.159	0.5293
0.0308	-0.5392	-0.7844	0.5545	0.285
1.0139	0.2308	0.4693	-0.134	0.4148
-0.557	-0.253	-0.5971	0.1473	1.1946
-0.1481	-0.2838	0.8849	0.4802	0.3912
0.1003	-0.6016	0.2053	0.5726	-1.2276
0.5868	-0.8403	-0.2704	0.3314	0.4114
1.2959	0.775	0.0423	-0.1229	-0.4433
-0.32	0.01	-0.9403	-0.1712	0.8876
1.1749	-0.2074	1.6069	0.8949	-0.6781
