# Supplementary material for: Spatially periodic computation in the entorhinal-hippocampal circuit during navigation
Source: eLife. 2026 Feb 17;14:RP107517. doi: 10.7554/eLife.107517 (PMC12912724; doi:10.7554/eLife.107517)
Supplement: Figure 3—source data 2. [file elife-107517-fig3-data2.xlsx]

## Sheet: Sheet1
Figure 3-source data 2
Related to Figure 3F
Each row represents a participant, and each column corresponds to a spatial direction from 0° to 360°, divided into 12 bins.
-1.5991	-0.7363	-0.2323	-0.9413	0.0191	0.321	-0.2156	-0.0561	0.7822	-0.1538	-0.0912	0.7099
-1.037	-0.0119	0.2374	0.013	-0.3228	-0.0479	0.4762	0.2182	-0.3759	-0.0468	0.245	0.2971
-0.5875	0.2041	-0.0095	-0.0046	0.0021	0.1129	0.08	0.0294	-0.0529	-0.0077	0.0464	-0.1888
-0.0733	0.118	0.1188	-0.1058	-0.0278	0.0189	0.2857	0.1311	-0.013	0.0695	0.1365	0.0179
-0.6086	-0.5164	0.5525	0.0484	-0.6585	-0.0798	0.5137	0.1477	-0.6148	-0.1384	0.5707	0.0853
-0.6197	-1.7734	0.8494	1.7084	-0.4976	-1.902	0.8099	1.634	-0.769	-2.2499	0.3662	1.22
0.5361	0.5598	0.8975	-0.3343	-0.6403	0.4404	0.6731	-0.8925	-1.093	0.3924	0.4685	-1.1536
0.1616	-1.7842	-1.0618	1.7869	0.8314	-2.0183	0.3596	2.2284	0.3087	-1.8706	-0.4587	1.7561
0.2469	0.506	-0.3614	-0.4887	0.5958	0.0718	-0.384	-0.4212	0.4225	0.4843	-0.5308	-0.0347
-0.6648	0.5696	0.3067	-0.0085	-0.2764	-1.2544	0.3101	-0.2546	-0.4403	0.1456	0.585	-0.211
-0.7903	-3.9136	-0.5932	3.7494	0.1807	-3.7149	-0.2929	3.9404	0.5622	-3.9351	-0.6185	3.4903
0.4408	0.0386	0.2791	-0.4443	-0.4425	0.0079	0.3684	-0.1275	-0.3329	0.2905	0.194	-0.3673
0.2719	0.3938	0.2761	-0.3105	0.1456	0.5092	-0.4713	-0.4191	0.3959	0.634	-0.1817	-0.809
-1.1072	-0.263	1.093	0.5563	-1.6131	-0.7401	1.1191	0.6757	-0.4241	-0.3788	1.044	0.0401
0.5456	0.853	-0.3709	-0.2199	0.8239	0.3481	0.1443	-0.2409	0.1955	0.1283	-0.4304	-0.262
0.605	0.5069	-0.0925	-0.3505	0.0724	0.5175	-0.3567	-0.4827	0.1521	0.4561	-0.1053	-0.4144
2.2481	2.5779	-0.6242	-2.7247	0.8995	2.613	-0.7589	-2.6241	0.6779	2.4536	-1.4906	-1.7171
-2.154	3.2225	1.5155	-3.3793	-3.4392	3.5081	2.6101	-2.6639	-3.2098	2.8918	2.011	-3.8853
0.3553	-1.2819	-0.4043	1.2086	0.9176	-1.0745	-0.7733	1.0974	1.1239	-0.9267	-0.841	1.4934
-8.8239	2.6131	8.1793	-1.4034	-7.4777	-1.9419	8.4806	-2.5328	-8.5352	3.1258	8.1319	-4.9604
0.1309	1.0011	0.015	-0.882	-0.3427	0.922	-0.2287	-0.8738	-0.7283	1.0001	0.4427	-0.8736
-1.4605	0.0701	0.6524	0.1312	-0.7921	0.1904	0.6828	0.4191	-0.6086	0.1344	0.6911	-0.3007
-0.2046	0.3975	0.4603	-0.8063	-0.4058	0.7865	0.6817	-0.7336	-0.2654	0.5253	0.3134	-0.7171
0.4049	-0.3433	-0.6277	0.5517	0.3842	-0.4826	-0.3681	0.4653	0.6707	-0.3958	-0.5248	0.5067
-0.0808	0.0948	0.0277	-0.1195	0.1136	0.1122	0.1716	-0.1399	-0.1604	0.1338	0.1514	-0.095
0.5832	-0.7916	-0.8159	0.7753	0.7279	-1.0415	-0.9854	0.9206	0.583	-0.7281	-0.6466	0.7987
-1.0434	0.0396	0.9762	0.1174	-0.9785	-0.08	1.0445	0.3494	-1.0275	-0.6085	0.9921	-0.0441
0.0466	0.2528	0.0606	-0.2818	0.0274	0.2603	0.1256	-0.2251	-0.0841	0.2713	0.0749	-0.2397
0.368	-0.5761	0.1602	0.5838	-0.2436	-0.5025	-0.1577	0.3504	-0.0377	-0.4449	0.4716	0.184
0.8117	-0.0446	-0.7957	-1.1023	0.735	0.1521	-0.8666	0.2392	0.5929	0.4043	-0.6291	0.4932
-2.4233	-0.8261	2.0344	0.7332	-1.8549	-0.6525	1.9649	0.701	-2.154	-0.8222	2.0446	0.4121
-0.0295	0.0289	-0.0052	-0.0941	-0.0126	0.0382	0.1546	-0.0874	-0.0395	-0.0133	0.0521	0.0519
-0.1845	-1.2882	-1.1963	2.0261	1.0984	-2.1804	-0.7092	2.1506	0.4878	-2.0334	-0.89	2.2233
