# Supplementary material for: Spatially periodic computation in the entorhinal-hippocampal circuit during navigation
Source: eLife. 2026 Feb 17;14:RP107517. doi: 10.7554/eLife.107517 (PMC12912724; doi:10.7554/eLife.107517)
Supplement: Figure 4—source data 2. [file elife-107517-fig4-data2.xlsx]

## Sheet: Sheet1
Figure 4-source data 2
Related to Figure 4C
Each row represents a participant, and each column corresponds to an HPC phase value from –π to π.
Coupling between 3-fold HPC activity and 6-fold EC activity
0.600734	0.434789	0.573891	0.180371	0.02292	-0.155517	-0.651528	-0.898958	-0.047764
-0.44063	0.171499	0.034807	0.201648	0.420872	0.19594	0.135439	-0.186871	-0.565561
-0.169846	-0.064752	0.025648	0.266309	0.017921	0.167995	-0.025231	-0.073349	-0.244221
-0.00094	0.026317	0.072442	-0.116956	0.197484	-0.090254	0.055065	-0.074122	-0.017464
0.083379	0.133672	-0.084093	-0.162617	-0.077262	0.020769	-0.014707	-0.00248	0.020632
-0.136262	-0.167839	0.074205	0.393864	0.557117	0.044509	-0.157933	-0.382946	-0.020156
-0.039616	0.051194	-0.072289	-0.061209	0.083184	-0.042665	0.097019	0.063751	-0.116943
0.014039	0.130799	0.15672	-0.124114	-0.059636	-0.165063	-0.206452	-0.005502	0.228882
0.023504	0.082246	-0.503479	-0.155399	0.05284	0.286411	0.188286	0.085667	0.038933
0.172806	0.29451	0.207713	0.186426	0.010443	-0.191927	-0.264902	-0.25015	-0.19543
-0.042927	-0.026242	0.077131	0.388268	0.312894	0.53101	-0.228641	-0.480094	-0.537354
0.407525	-0.096853	-0.049155	-0.219425	-0.176753	0.009747	0.042254	0.409029	-0.159716
-0.082843	0.041018	0.114857	0.124634	0.159664	0.062408	-0.017145	-0.208373	-0.146503
-0.26424	-0.437518	-0.275015	0.080999	0.184548	0.482622	0.48665	-0.020263	-0.178618
0.018687	-0.044385	-0.040751	-0.080764	0.128492	-0.087625	-0.019965	0.032958	0.11138
0.00386	0.007106	0.14109	0.180305	0.072884	-0.091808	-0.149781	-0.016018	-0.199364
-0.085011	-0.340531	-0.131743	0.044211	0.214139	0.198846	0.080444	0.006557	-0.110918
0.910597	-0.588034	0.540363	0.701253	0.446033	-0.479877	0.25276	0.539666	-0.604696
0.064519	0.101605	0.035401	0.050951	0.032	-0.361168	-0.069399	0.097112	-0.010482
-0.234561	0.847364	0.272912	-0.14077	-0.38934	-0.515711	-0.111872	0.435313	0.009271
0.129233	0.178783	0.18375	0.166115	-0.090505	-0.400937	-0.149234	-0.071423	-0.003318
0.148281	0.095057	-0.023647	-0.157733	-0.147803	-0.039815	-0.008048	0.042877	0.115561
-0.024509	-0.035581	0.010354	0.009514	0.009767	0.002063	0.013172	0.005913	-0.000533
0.011837	0.045674	0.040544	-0.01307	-0.021701	-0.090562	-0.124541	0.096232	0.044623
-0.008549	0.052033	0.101521	0.12345	0.252782	-0.127965	-0.090801	-0.253738	-0.067043
0.025348	-0.206315	0.231067	-0.064199	0.274981	0.077788	-0.11014	0.008958	-0.090076
-0.018232	-0.040605	0.068437	0.064989	0.027694	0.023094	-0.014466	-0.025379	-0.097427
0.06282	0.045459	0.000397	-0.004411	-0.073608	-0.003329	-0.02556	-0.062653	0.020214
-0.055953	-0.515256	0.343142	0.137744	0.161768	0.149023	0.091616	0.034681	-0.230334
0.016136	-0.069889	-0.065477	0.04412	-0.021508	-0.037502	0.027808	0.080547	0.014482
0.019831	-0.008098	-0.086151	0.009593	-0.035451	0.054783	0.04122	0.015595	0.007889
-0.118577	-0.0992	-0.03457	-0.0769	0.023459	0.18399	0.145584	0.012203	-0.065344
-0.194424	0.143859	0.20744	-0.05708	0.286055	-0.243677	-0.129905	-0.021267	-0.070934
Coupling between 3-fold HPC activity and 9-fold EC activity
0.109856	-0.002774	-0.075775	0.114131	0.06187	0.114002	0.057789	-0.151706	-0.202755
-0.12627	0.102851	-0.039531	0.33602	0.02921	0.245321	-0.015863	-0.244784	-0.347563
-0.270503	-0.19241	-0.114848	-0.008386	0.124839	0.146298	0.2494	0.098856	-0.108137
0.01213	0.007002	0.100901	0.066533	0.025334	-0.09301	0.00111	-0.057239	-0.008905
-0.038402	0.027665	0.011085	0.098791	0.118677	0.185786	-0.170498	-0.08216	-0.063867
0.083676	-0.023974	-0.064527	0.093112	0.132662	-0.263165	-0.130724	0.244118	-0.235861
0.407066	0.155249	-0.103454	0.064187	-0.002177	-0.168389	-0.065497	0.082037	-0.066568
-0.325269	-0.229112	-0.150625	0.150442	0.151362	0.173194	0.182109	0.096919	0.055003
0.173844	-0.022669	0.045891	-0.946742	-0.355656	0.114965	-0.065347	0.977833	0.437285
-0.283702	0.12369	0.163531	0.423647	0.181765	0.671224	0.335554	-0.341276	-1.40703
0.224807	0.363536	0.291931	0.013281	0.091204	-0.077043	-0.466732	-0.383972	-0.071403
0.093381	-0.129732	-0.107724	-0.10802	0.202638	0.040867	0.076126	0.112167	-0.143714
-0.034942	0.069369	0.003262	0.045979	0.053397	0.141774	0.067616	-0.155911	-0.103234
-0.176681	0.152649	0.289243	0.281244	0.28902	0.318142	0.100564	-0.38233	-0.631677
0.186097	0.18054	-0.02596	-0.233097	-0.013072	-0.283467	0.039821	0.07265	0.090219
0.108622	0.03083	-0.065366	-0.004116	0.075731	-0.09608	0.031873	0.148701	-0.129374
0.17604	0.090188	0.254305	0.396229	-0.206322	-0.182141	-0.228487	-0.116052	-0.042658
0.218579	-0.329693	0.073099	0.773346	0.164075	0.048466	0.027647	0.1932	-0.528979
0.264649	0.021021	0.079708	-0.018411	-0.141738	-0.631857	-0.030779	0.12636	0.301132
-0.539248	-0.083187	0.111952	0.106396	0.014174	0.206178	0.362466	0.167528	-0.570522
-0.24849	-0.082238	0.161839	0.341924	0.201086	-0.198791	0.033408	-0.106442	-0.213957
0.147133	-0.204278	0.024241	0.007293	-0.016329	0.077701	0.064775	-0.046389	-0.065039
-0.037096	-0.072745	0.040098	0.004553	-0.039792	-0.012507	-0.020638	0.039866	0.04764
0.064886	-0.01168	-0.007222	0.020409	-0.076402	-0.073044	0.040908	0.01238	0.008595
0.048219	0.134623	0.177713	0.133494	0.159938	-0.018969	-0.198823	-0.295048	-0.039208
-0.034413	0.104296	-0.097469	0.13823	-0.074009	-0.071771	-0.320665	0.1017	0.083828
0.226763	0.177669	0.215771	-0.070657	-0.145915	-0.190579	-0.179673	-0.124232	0.059566
0.092029	0.03223	-0.074619	-0.123838	-0.100366	-0.080095	0.006586	0.024905	0.135358
0.189915	-0.491207	0.163462	0.231351	-0.056218	-0.062999	0.172263	0.054667	-0.173773
-0.031576	-0.122033	-0.143172	0.060044	-0.106463	-0.034876	0.171211	0.185359	0.004455
-0.136105	0.179033	0.067414	-0.027434	-0.023487	-0.06829	-0.037381	-0.106907	0.078421
0.081748	0.174779	0.093517	-0.003445	-0.027498	-0.04379	-0.175848	-0.034109	-0.063207
-0.041113	0.086538	0.160411	-0.049561	0.265044	-0.204096	-0.026161	0.009445	-0.196587
Coupling between 3-fold HPC activity and 12-fold EC activity
0.203797	-0.05208	0.080448	-0.035232	-0.164645	0.163661	-0.007191	-0.166573	-0.013975
-0.20329	-0.172581	-0.056967	0.320413	0.064944	0.37898	0.091909	-0.09837	-0.373088
-0.185363	0.048865	-0.033429	0.003647	-0.024289	0.122966	0.038062	0.090614	-0.155663
0.0678	-0.010692	-0.07546	-0.121526	-0.108251	-0.137192	0.014128	0.013935	0.098935
-0.055778	-0.028065	-0.013829	0.018756	0.059053	0.16267	-0.019863	-0.019183	-0.061276
0.173749	-0.09742	0.065038	0.041629	0.131964	-0.51497	0.126053	-0.074019	0.051912
0.327624	0.017994	-0.143785	0.019768	0.023801	0.02882	-0.020694	0.143818	-0.081036
-0.084476	-0.113543	-0.100764	0.061336	0.06974	0.065744	0.080055	0.060171	-0.004548
-0.076502	-0.102153	0.140367	-0.408389	0.160596	0.353312	-0.120766	0.359107	-0.176173
-0.113604	0.263403	0.247951	0.466465	0.440276	0.151992	-0.028949	-0.391672	-1.06988
0.292447	0.11314	0.043349	-0.302542	-0.269382	-0.277413	-0.237313	0.068094	0.846536
0.037628	0.070213	0.127367	-0.000935	0.068124	-0.077022	-0.037054	0.018397	-0.189818
0.096767	0.084531	0.151377	0.026177	0.037112	-0.129449	-0.217635	-0.117678	0.055988
-0.335834	0.159325	0.30285	0.40209	0.38872	0.318241	0.072928	-0.424231	-0.696882
-0.027393	-0.341348	-0.29429	-0.229549	0.267568	-0.029458	0.38033	0.249344	0.115367
0.061474	0.06319	-0.133386	-0.00199	0.165955	-0.172648	0.159075	0.051406	-0.089469
0.260366	0.004071	0.156875	-0.000976	-0.071224	-0.091878	-0.310188	0.017392	0.002304
0.012725	-0.323424	-0.087668	-0.001109	-0.156113	0.239807	0.385705	-0.164235	0.00885
0.135467	0.372558	0.395198	0.271762	-0.125287	-0.544885	-0.338916	-0.19304	-0.095247
-0.264499	0.04952	-0.157255	-0.201129	-0.0059	0.086253	0.241956	0.455531	-0.243733
-0.067094	0.019215	0.137037	0.108036	0.072765	-0.169363	-0.029262	-0.011229	-0.134401
0.148516	-0.197371	0.038567	0.05914	0.121378	0.079087	0.010247	-0.09965	-0.161807
0.086661	-0.039153	-0.028696	-0.129411	-0.136351	-0.090975	0.016787	0.089396	0.16443
-0.018978	-0.035688	-0.028306	0.018833	-0.046694	0.019781	0.101172	0.009633	-0.006256
0.093663	0.178543	0.21581	0.126903	-0.062051	0.231247	-0.286118	-0.259564	0.061022
-0.009652	0.084608	0.07171	0.106289	-0.171702	0.061933	-0.118236	0.059298	-0.055122
0.101093	0.052788	0.083584	-0.013884	-0.067052	-0.018178	-0.069027	-0.094614	-0.006411
-0.053876	-0.079321	-0.125702	-0.025527	0.049113	0.099129	0.106824	-0.01948	-0.003472
0.079888	-0.387291	0.06638	0.188691	0.0925	0.049729	0.164759	0.027072	-0.237622
0.010247	0.058641	0.026554	-0.063786	-0.1642	-0.14298	0.051629	0.060777	0.108688
-0.037554	0.004491	0.183128	0.049192	0.054104	0.006689	0.004084	-0.2023	-0.096287
0.013089	-0.059649	-0.128943	-0.181409	-0.045776	0.090825	0.158241	0.050162	0.046338
-0.43038	-0.106127	0.063336	0.536563	-0.171869	0.195247	0.377158	0.266547	-0.105924
