# Supplementary material for: Spatially periodic computation in the entorhinal-hippocampal circuit during navigation
Source: eLife. 2026 Feb 17;14:RP107517. doi: 10.7554/eLife.107517 (PMC12912724; doi:10.7554/eLife.107517)
Supplement: Figure 5—source data 1. [file elife-107517-fig5-data1.xlsx]

## Sheet: Sheet1
Figure 5-source data 1
Related to Figure 5B
Each row represents a participant, and each column corresponds to a spatial direction from 0° to 360°, divided into 36 bins.
3.53745	9.03885	5.75584	4.20012	4.76611	2.24632	2.44821	3.59326	2.4701	4.49957	2.14429	1.71382	3.33532	1.37735	3.84415	2.93042	2.66641	2.83948	3.61362	2.99266	3.79989	3.45275	2.33868	2.75404	2.81235	2.99186	4.71308	4.48768	2.67575	3.31762	2.51261	3.88698	4.28706	2.1166	2.62572	4.36603
2.73577	2.49052	3.83696	4.21878	3.41657	1.80631	1.49512	1.64746	2.39127	2.15089	1.6111	1.83961	2.29304	3.16913	2.56208	2.03946	1.86234	2.21152	2.66633	1.77775	2.04933	1.87039	2.53007	2.86445	2.17409	2.28843	3.35148	2.71442	2.46909	3.43942	2.63209	2.18382	3.11271	1.94164	3.86251	2.96986
2.58131	1.89347	1.89386	1.37567	2.1366	1.76691	1.90597	1.89501	1.93471	1.68394	1.89655	1.79653	1.91446	1.79899	1.70882	1.17634	2.06735	1.53262	1.68323	1.27093	1.49916	1.38224	1.45788	2.07022	1.4723	1.83164	1.56699	1.81983	1.57486	1.40798	2.01899	1.88232	1.43645	1.6892	2.51591	1.53724
0.254351	0.212342	0.375564	0.207033	0.152959	0.216093	-0.0984936	-0.1285	-0.134515	0.586845	0.467012	0.00960646	0.0743639	0.313133	0.12631	0.452105	0.250592	-0.0554075	0.359297	0.00889203	0.055097	0.46028	0.422964	0.573189	-0.195181	-0.0512527	0.0135496	0.0097347	0.0610277	-0.0872091	-0.184089	-0.0400195	-0.315463	0.104022	-0.213134	0.0710299
0.158484	-0.158616	-0.0454053	-0.432668	-0.313001	-0.449268	-0.359911	-0.856348	-0.712611	0.249273	-0.511274	-0.482678	-0.685029	-0.674579	-0.260259	-0.327312	-0.455773	-0.199284	-0.0927231	0.0310446	-0.487962	-0.241986	-0.519353	-0.534521	-0.635339	-0.475036	-0.412946	-0.194668	-0.472266	-0.687594	-0.768252	-0.343931	-0.742785	-0.292102	-0.498579	-0.647226
-0.817622	-0.857997	-0.994647	-1.11948	-0.918381	-1.07398	-0.991146	-1.05851	-0.958485	-0.780563	-0.768175	-0.944059	-0.987915	-0.776947	-0.877353	-0.85437	-0.783256	-0.509543	-0.662251	-0.711702	-0.853271	-0.466726	-0.98753	-0.844038	-0.988838	-0.72196	-0.964256	-0.747575	-1.00378	-0.900492	-0.667077	-0.785307	-1.07464	-0.615637	-0.651759	-0.627325
0.532411	0.27524	0.350449	0.500096	0.472475	0.295437	-0.0119366	0.382159	0.617429	0.12595	0.144251	0.838784	0.67121	0.656091	0.565495	0.392381	0.289089	0.0920857	0.404845	0.390361	0.260301	0.735223	0.799487	1.05339	0.571265	0.350064	0.886717	0.302361	0.306978	0.0265332	0.061156	0.769481	0.820319	0.405076	0.583037	0.617198
0.562994	0.576266	0.355193	0.468743	0.737839	0.247427	0.415847	0.180028	0.165255	0.74982	0.602426	0.692676	1.35997	0.687059	1.01097	0.806008	0.704975	1.00809	0.608361	0.178181	0.46573	0.0997027	0.71293	0.289666	0.685008	0.363144	0.249562	0.635029	0.334017	0.263635	0.351987	0.208436	0.291744	0.500866	0.383777	0.298075
0.934805	0.125208	0.50202	0.19203	1.39737	0.88489	0.780156	0.364683	0.213496	1.38202	1.04098	0.82632	1.05549	0.996837	0.863828	1.34233	0.576459	0.32175	0.218805	0.0794566	0.251581	0.512077	0.38988	1.24718	1.2911	1.33297	0.706006	0.978127	1.46272	0.0841096	0.881332	0.575035	-0.397596	-0.24641	-0.025401	0.263617
-0.778639	-0.284547	-0.196207	-0.244146	-0.00924373	-0.545032	-0.291892	-0.420678	-0.666088	-0.135578	-0.258913	-0.0961854	0.0400938	-0.203708	-0.118652	-0.00962842	-0.47253	-0.275839	-0.353933	-0.0969548	0.0449987	0.0900083	-0.0643517	0.384071	-0.171278	-0.348086	-0.0817208	-0.436258	-0.357267	-0.314254	-0.580835	-0.505834	-0.484499	-0.443183	-0.412663	-0.667769
0.0184545	-0.466726	-0.639609	0.0261485	-0.341815	-0.489347	-0.373168	-0.028597	-0.466265	-0.2733	-0.644572	0.365708	-0.190821	-0.171073	0.199482	-0.360088	-0.555654	-0.223905	-0.820305	-0.63707	-0.200439	-0.473959	-0.363262	-0.726705	-0.467584	-0.070026	0.0512821	-0.179472	-0.020323	-0.0561769	-0.0504064	-0.699721	0.218805	0.0772084	-0.496015	-0.451591
-0.880199	-0.995993	-0.604179	-0.809896	-0.742537	-1.14564	-0.907417	-0.528124	-0.816596	-0.692698	-0.602909	-0.657152	-0.7193	-0.570133	-0.645973	-0.693044	-0.409137	-0.889982	-0.43949	-0.791719	-0.747607	-0.413176	-0.488028	-0.290458	-0.736092	-0.466265	-0.592061	-0.399789	-0.932807	-0.863603	-0.984617	-1.01977	-0.558079	-0.367936	-0.75607	-0.715982
0.351218	-0.337583	-0.124191	0.141778	-0.0642555	-0.292227	-0.0893378	0.0530773	0.107704	0.421398	-0.0636143	0.217728	0.129017	0.186952	0.125016	-0.160325	-0.100417	0.116552	-0.0115519	-0.309693	-0.158437	-0.183897	-0.0933876	-0.160199	0.275293	0.170795	0.421002	-0.108915	-0.354153	0.0158386	0.139057	0.343909	0.0133055	0.0158899	-0.103495	0.0602583
-0.112782	-0.14912	-0.0995515	0.0501096	0.187612	-0.181973	0.0675859	-0.0273795	-0.349701	0.0392282	-0.424486	-0.388652	-0.545609	-0.186644	0.03692	-0.488885	-0.147735	-0.251603	-0.266318	-0.537818	0.126478	0.0630795	-0.431257	0.00460539	-0.381851	-0.0616725	-0.19933	0.149636	0.726298	-0.13504	-0.160595	0.479399	0.103857	-0.119707	0.194087	-0.196207
-0.42076	-0.204863	-0.388043	-0.118058	-0.585521	-0.28161	-0.0730074	-0.386317	-0.392403	-0.195218	-0.250134	-0.430719	-0.444106	-0.261125	-0.190272	-0.672206	0.180687	-0.20544	-0.46136	-0.580392	-0.705931	-0.238011	-0.231599	-0.708163	-0.531125	-0.632069	-0.368332	-0.488357	-0.424204	-0.0519452	-0.656049	-0.631877	-0.526278	-0.564048	-0.73989	-0.842289
-0.555954	-0.827111	-0.657267	-0.516756	-0.416254	-0.601458	-0.78566	-0.577571	-0.612142	-0.692755	-0.838748	-0.692467	-0.778499	-0.814801	-0.49704	-0.655116	-0.575409	-0.868402	-0.840521	-0.65702	-0.572057	-0.791719	-0.643366	-0.561189	-0.878148	-0.821725	-0.783729	-0.696314	-0.695288	-0.642736	-0.794412	-0.544084	-0.347393	-0.731898	-0.816821	-0.642107
-0.294305	-0.704428	-0.817109	-0.389765	-0.540357	-0.255758	-0.586468	-0.569556	-0.704185	-0.390672	-0.954215	-0.919439	-0.576545	-0.738054	-0.266442	-0.748296	-0.583597	-0.799063	-0.442894	-0.815186	-0.553976	-0.825572	-0.389105	-0.744632	-0.303307	-0.451954	-0.822055	-0.820187	-0.696122	-0.577519	-0.556284	-0.270069	-0.451646	-0.540756	-0.671693	-0.82898
-0.825023	-0.555515	-0.772099	-0.95637	-0.616681	-0.754788	-0.586002	-0.877452	-0.55654	-0.599883	-0.904243	-0.689774	-0.815763	-0.871846	-0.919439	-0.862943	-0.991377	-0.984068	-1.0199	-0.852245	-1.02581	-1.05762	-0.946697	-0.825765	-1.23097	-0.980001	-1.12785	-1.07389	-1.10448	-0.65092	-0.949189	-1.01965	-0.856348	-1.04199	-0.724551	-0.863273
-0.715549	-0.534068	-0.630608	-0.672976	-0.808646	-0.419332	-0.468188	-0.614502	-0.788641	0.00749063	-0.91352	-0.59033	-0.795822	-0.323996	-0.792488	-0.704873	-0.370763	-0.784465	-0.709883	-0.698526	-0.870197	-0.932848	-0.759635	-0.870197	-0.895844	-1.04193	-1.01931	-0.749306	-0.893939	-0.875391	-0.456339	-0.52756	-0.908282	-0.818956	-0.735663	-0.804414
-0.420101	-0.241216	-0.0882167	-0.457494	-0.539416	-0.235446	-0.591484	-0.153736	-0.280167	0.158484	-0.136886	0.175411	0.019801	0.0825067	0.0619254	0.131267	-0.122345	-0.254296	-0.289458	-0.705393	0.173762	0.20034	-0.251813	-0.242627	-0.142489	0.142327	0.286781	-0.184996	-0.50233	-0.432507	-0.885893	-0.466265	0.0334577	-0.517622	-0.058485	-0.605595
-0.106765	-0.373727	-0.318284	-0.197046	-0.332101	-0.276416	-0.0537917	-0.226873	0.0525644	-0.250738	-0.367301	-0.0214441	-0.0412286	-0.402295	-0.224367	-0.055696	-0.196207	-0.0715648	-0.354318	-0.35778	-0.249295	-0.213903	-0.0168278	0.332945	0.0323036	0.226191	-0.131578	-0.213134	-0.311616	-0.273531	-0.240832	-0.248141	-0.378763	-0.511769	-0.224565	-0.332678
-0.0938772	-0.232928	-0.11167	-0.237424	-0.132732	-0.00635849	0.246709	-0.167849	-0.18005	-0.229098	0.317365	0.293458	0.34237	0.319178	0.0745105	-0.0302482	-0.373424	-0.299745	-0.0640632	-0.429334	-0.159045	-0.362396	-0.277323	-0.186718	0.164859	-0.399327	-0.263984	-0.463956	-0.589608	-0.612835	-0.41635	-0.49027	-0.190052	-0.273762	-0.122345	-0.655003
-0.508636	-0.690543	-0.488687	-0.424461	-0.0438665	-0.463187	-0.70447	-0.271992	-0.704008	-0.633608	-0.74267	-0.75825	-0.900204	-0.508838	-0.569107	-0.732366	-0.738631	-0.800086	-0.749018	-0.606776	-0.608449	-0.714523	-0.990223	-0.944059	-0.708336	-0.935537	-1.01831	-0.691478	-0.749018	-0.790853	-0.593984	-0.954215	-0.624145	-0.858866	-0.757096	-0.841576
-0.220827	-0.391537	-0.476652	-0.328193	-0.495694	-0.750172	-0.403524	-0.686532	-0.411125	-0.494732	-0.560241	-0.100994	-0.57039	-0.898088	-0.398558	-0.723792	-0.381785	-0.647457	-0.334185	-0.409945	-0.0410454	-0.355856	-0.381554	-0.582366	-0.53551	-0.447799	-0.255758	-0.0118817	-0.157891	-0.305846	-0.402501	-0.292521	-0.646633	-0.318211	-0.785949	-0.522623
-0.222174	-0.727749	-0.562747	-0.550975	-0.689005	-0.63806	-0.657844	-0.969738	-1.0354	-0.649766	-0.9179	-0.601582	-0.756107	-0.405098	-0.23006	-0.295129	0.0256355	-0.405922	-0.280621	0.205418	-0.448376	0.00628407	0.174834	-0.626453	-0.372783	-0.188513	-0.31712	0.220036	-0.368551	-0.46643	-0.28084	-0.554553	-0.869778	-0.578596	-0.439336	-0.36573
-0.645726	-0.716318	-0.799273	-0.975861	-0.880419	-0.937904	-0.983555	-0.661076	-0.756386	-0.657459	-0.781909	-1.00176	-0.908807	-0.895587	-0.897896	-0.80305	-1.00612	-0.909766	-1.19873	-0.899947	-0.899215	-0.891356	-0.822803	-0.588137	-0.912404	-0.716703	-0.536979	-0.788092	-0.57398	-0.842037	-0.295459	-0.503965	-0.546282	-0.719011	-0.371052	-0.129269
-0.0373267	-0.349124	-0.349124	-0.317675	-0.249039	-0.144273	-0.225059	-0.357549	0.269585	0.484247	-0.267299	-0.423275	-0.308953	-0.215442	-0.227472	-0.489017	-0.419332	-0.793258	-0.619759	-0.869868	-0.332967	-0.4171	-0.34018	-0.75248	-0.524431	-0.534933	-0.579077	0.220036	-0.0525222	0.298322	0.118476	-0.343766	-0.267299	-0.311905	-0.030479	-0.218401
0.282742	-0.292491	0.12867	-0.847115	-0.262155	0.128324	-0.275711	-0.268786	-0.197938	-0.395737	-0.374147	-0.772484	-0.314848	-0.452672	-0.415946	-0.430199	0.178643	0.0961635	-0.11183	-0.162507	-0.575904	-0.780598	-0.378092	-0.645149	-0.594204	-0.680234	-0.51416	0.0320151	-0.312539	-0.444106	-0.448088	-0.265782	-0.249757	-0.181039	-0.144965	-0.201977
-0.210979	0.0336226	-0.129269	-0.142157	-0.419716	-0.157178	-0.0860734	-0.0864397	-0.183407	-0.465111	-0.656165	-0.537818	-0.495758	-0.480691	-0.51566	-0.612257	-0.310462	-0.409483	-0.534851	-0.40823	-0.954215	-0.473399	-0.684965	-0.325136	-0.480883	-0.655247	-0.698149	-0.537818	-0.427795	-0.418306	-0.348547	-0.387786	-0.29447	-0.404713	-0.241794	-0.378784
-0.327004	-0.726041	-0.939023	-1.0013	-0.824264	-0.883585	-0.902704	-0.727955	-0.830329	-0.831947	-0.714395	-0.412599	-0.966628	-0.551845	-0.715549	-0.699103	-0.171971	-0.798131	-0.471804	-0.756886	-0.686004	-0.792378	-0.831824	-0.829112	-0.70093	-0.708624	-0.436951	-0.861294	-0.77585	-0.814224	-0.594241	-0.247449	-0.716991	-0.255066	-0.742093	-0.674434
-0.309967	0.0236035	-0.207748	-0.243653	-0.114035	-0.0465045	0.129247	-0.174151	0.00864472	0.00114311	0.307817	-0.0728837	0.280665	0.0946247	-0.118883	0.219089	0.266585	0.00255367	0.196762	-0.162046	-0.077566	0.486151	0.586557	0.390842	0.206379	0.157177	0.219267	-0.114959	-0.119407	-0.444652	-0.288534	-0.132501	-0.185589	-0.0688719	-0.395173	-0.181099
0.328521	0.285215	0.268316	0.370453	0.245286	0.265046	0.0663494	0.339754	0.251735	-0.0300174	0.178232	0.460241	-0.113882	0.774616	0.152906	-0.216981	0.0136283	-0.102956	0.399305	0.360066	0.278703	-0.0974165	0.328617	0.495184	0.417194	0.532521	0.495864	0.328741	0.284226	0.301372	0.804623	0.196185	0.400844	1.6942	0.566264	0.556262
1.09268	0.713219	0.0723122	0.444892	0.24408	0.692445	0.505738	0.623776	0.763229	0.641665	1.06637	0.512983	1.79576	0.294283	0.712559	0.853598	0.870945	0.723028	0.786661	0.390765	0.602426	0.277301	0.693104	1.00207	0.561538	0.561965	0.0719275	0.159254	0.441622	0.297457	0.0937853	0.674749	1.00741	1.08747	1.0833	1.3602
