# Supplementary material for: Spatially periodic computation in the entorhinal-hippocampal circuit during navigation
Source: eLife. 2026 Feb 17;14:RP107517. doi: 10.7554/eLife.107517 (PMC12912724; doi:10.7554/eLife.107517)
Supplement: Figure 5—source data 2. [file elife-107517-fig5-data2.xlsx]

## Sheet: Sheet1
Figure 5-source data 2
Related to Figure 5C
3.747e-16
0.492161
0.216496
0.841838
0.0751233
0.0679698
0.381618
0.0206361
0.577749
0.0323382
0.157846
0.0575472
