# Supplementary material for: Spatially periodic computation in the entorhinal-hippocampal circuit during navigation
Source: eLife. 2026 Feb 17;14:RP107517. doi: 10.7554/eLife.107517 (PMC12912724; doi:10.7554/eLife.107517)
Supplement: Figure 5—source data 3. [file elife-107517-fig5-data3.xlsx]

## Sheet: Sheet1
Figure 5-source data 3
Related to Figure 5D
Each row represents a participant
Brain-Behavior Coupling		Surrogates
0.7769		0.4247
0.9572		0.4726
0.7919		0.4682
0.9547		0.485
0.9599		0.487
0.9479		0.4183
0.9576		0.4255
0.958		0.465
0.97		0.3265
0.9678		0.4916
0.479		0.4662
0.8571		0.4444
0.1348		0.3366
0.9623		0.4927
0.992		0.563
0.9031		0.5402
0.8618		0.5018
0.9344		0.5917
0.837		0.5026
0.5769		0.3932
0.2247		0.4454
0.7536		0.4773
0.3777		0.3809
0.4412		0.371
0.1357		0.3696
0.9817		0.3506
0.6696		0.3944
0.9187		0.3971
0.9608		0.5036
0.903		0.3359
0.9291		0.4745
0.9022		0.6046
0.7524		0.4257
