# Supplementary material for: Spatially periodic computation in the entorhinal-hippocampal circuit during navigation
Source: eLife. 2026 Feb 17;14:RP107517. doi: 10.7554/eLife.107517 (PMC12912724; doi:10.7554/eLife.107517)
Supplement: Figure 6—source data 1. [file elife-107517-fig6-data1.xlsx]

## Sheet: Sheet1
Figure 6-source data 1
Related to Figure 6C
Path ID	Coordinate x	Coordinate y
Path0	90	70
Path0	88	70
Path0	86	70
Path0	84	70
Path0	82	70
Path0	80	70
Path0	78	70
Path0	76	70
Path0	74	70
Path0	73	69
Path0	72	68
Path0	70	68
Path0	69	67
Path0	68	66
Path0	67	65
Path0	66	64
Path0	65	63
Path0	64	62
Path0	63	61
Path0	62	60
Path0	61	59
Path0	60	58
Path0	59	58
Path0	58	57
Path0	57	56
Path0	56	55
Path0	55	54
Path0	51	51
Path1	76	86
Path1	76	84
Path1	76	82
Path1	76	80
Path1	76	78
Path1	76	76
Path1	76	74
Path1	76	72
Path1	75	71
Path1	74	70
Path1	73	69
Path1	72	68
Path1	70	68
Path1	69	67
Path1	68	66
Path1	67	65
Path1	66	64
Path1	65	63
Path1	64	62
Path1	63	61
Path1	62	60
Path1	61	59
Path1	60	58
Path1	59	58
Path1	58	57
Path1	57	56
Path1	56	55
Path1	55	54
Path1	51	51
Path2	94	43
Path2	94	45
Path2	94	47
Path2	94	49
Path2	94	51
Path2	94	53
Path2	94	55
Path2	94	57
Path2	94	59
Path2	94	61
Path2	94	63
Path2	93	64
Path2	93	66
Path2	92	67
Path2	90	67
Path2	88	67
Path2	86	67
Path2	84	67
Path2	82	67
Path2	80	67
Path2	78	67
Path2	76	67
Path2	74	67
Path2	72	67
Path2	70	67
Path2	69	66
Path2	68	65
Path2	67	64
Path2	66	63
Path2	64	63
Path2	63	62
Path2	62	61
Path2	61	60
Path2	60	59
Path2	59	58
Path2	58	57
Path2	57	56
Path2	56	55
Path2	55	54
Path2	51	51
Path3	90	30
Path3	88	30
Path3	86	30
Path3	84	30
Path3	82	30
Path3	80	30
Path3	78	30
Path3	76	30
Path3	75	29
Path3	73	29
Path3	71	29
Path3	69	29
Path3	67	29
Path3	65	29
Path3	63	29
Path3	61	29
Path3	59	29
Path3	57	29
Path3	55	29
Path3	55	31
Path3	54	32
Path3	54	34
Path3	53	35
Path3	53	37
Path3	52	38
Path3	52	40
Path3	52	41
Path3	51	43
Path3	51	45
Path3	50	50
Path4	70	10
Path4	68	10
Path4	66	10
Path4	64	10
Path4	62	10
Path4	61	11
Path4	60	12
Path4	60	14
Path4	59	15
Path4	59	17
Path4	58	18
Path4	58	20
Path4	58	22
Path4	57	23
Path4	56	24
Path4	56	26
Path4	55	27
Path4	55	29
Path4	55	31
Path4	54	32
Path4	54	34
Path4	53	35
Path4	53	37
Path4	52	38
Path4	52	40
Path4	52	41
Path4	51	43
Path4	51	45
Path4	50	50
Path5	7	64
Path5	9	64
Path5	11	64
Path5	13	64
Path5	15	64
Path5	17	64
Path5	18	63
Path5	19	62
Path5	21	62
Path5	22	61
Path5	24	61
Path5	25	60
Path5	26	59
Path5	28	59
Path5	29	58
Path5	30	57
Path5	32	57
Path5	33	56
Path5	35	56
Path5	36	55
Path5	38	55
Path5	39	54
Path5	40	54
Path5	41	53
Path5	42	53
Path5	44	52
Path5	45	52
Path5	47	51
Path5	50	50
Path6	50	95
Path6	52	95
Path6	54	95
Path6	56	95
Path6	58	95
Path6	60	95
Path6	61	94
Path6	63	94
Path6	64	93
Path6	66	93
Path6	67	92
Path6	67	90
Path6	67	88
Path6	67	86
Path6	68	85
Path6	69	84
Path6	70	83
Path6	71	82
Path6	71	80
Path6	71	78
Path6	71	76
Path6	71	74
Path6	71	72
Path6	71	70
Path6	71	68
Path6	70	67
Path6	69	66
Path6	68	65
Path6	67	64
Path6	66	63
Path6	64	63
Path6	63	62
Path6	62	61
Path6	61	60
Path6	60	59
Path6	59	58
Path6	58	57
Path6	57	56
Path6	56	55
Path6	55	54
Path6	51	51
Path7	24	86
Path7	24	84
Path7	24	82
Path7	23	81
Path7	22	80
Path7	22	78
Path7	22	76
Path7	22	74
Path7	22	72
Path7	22	70
Path7	22	68
Path7	22	66
Path7	22	64
Path7	22	62
Path7	23	61
Path7	24	60
Path7	26	60
Path7	27	59
Path7	28	58
Path7	30	58
Path7	31	57
Path7	32	56
Path7	34	56
Path7	35	55
Path7	37	55
Path7	38	54
Path7	40	54
Path7	41	53
Path7	42	53
Path7	44	52
Path7	45	52
Path7	47	51
Path7	50	50
Path8	10	70
Path8	10	68
Path8	10	66
Path8	12	66
Path8	14	66
Path8	14	64
Path8	16	64
Path8	17	63
Path8	19	63
Path8	20	62
Path8	21	61
Path8	23	61
Path8	24	60
Path8	26	60
Path8	27	59
Path8	28	58
Path8	30	58
Path8	31	57
Path8	32	56
Path8	34	56
Path8	35	55
Path8	37	55
Path8	38	54
Path8	40	54
Path8	41	53
Path8	42	53
Path8	44	52
Path8	45	52
Path8	47	51
Path8	50	50
Path9	57	6
Path9	57	8
Path9	57	10
Path9	57	12
Path9	57	14
Path9	57	16
Path9	57	18
Path9	57	20
Path9	57	22
Path9	56	23
Path9	56	25
Path9	56	27
Path9	55	28
Path9	55	30
Path9	54	31
Path9	54	33
Path9	54	35
Path9	53	36
Path9	53	38
Path9	52	39
Path9	52	41
Path9	51	43
Path9	51	45
Path9	50	50
Path10	18	82
Path10	18	80
Path10	18	78
Path10	18	76
Path10	18	74
Path10	18	72
Path10	18	70
Path10	18	68
Path10	18	66
Path10	18	64
Path10	19	63
Path10	20	62
Path10	21	61
Path10	23	61
Path10	24	60
Path10	26	60
Path10	27	59
Path10	28	58
Path10	30	58
Path10	31	57
Path10	32	56
Path10	34	56
Path10	35	55
Path10	37	55
Path10	38	54
Path10	40	54
Path10	41	53
Path10	42	53
Path10	44	52
Path10	45	52
Path10	47	51
Path10	50	50
Path11	95	50
Path11	95	52
Path11	95	54
Path11	95	56
Path11	95	58
Path11	95	60
Path11	94	61
Path11	94	63
Path11	93	64
Path11	93	66
Path11	92	67
Path11	90	67
Path11	88	67
Path11	86	67
Path11	84	67
Path11	82	67
Path11	80	67
Path11	78	67
Path11	76	67
Path11	74	67
Path11	72	67
Path11	70	67
Path11	69	66
Path11	68	65
Path11	67	64
Path11	66	63
Path11	64	63
Path11	63	62
Path11	62	61
Path11	61	60
Path11	60	59
Path11	59	58
Path11	58	57
Path11	57	56
Path11	56	55
Path11	55	54
Path11	51	51
Path12	70	90
Path12	71	89
Path12	72	88
Path12	72	86
Path12	72	84
Path12	72	82
Path12	72	80
Path12	72	78
Path12	72	76
Path12	72	74
Path12	72	72
Path12	72	70
Path12	72	68
Path12	70	68
Path12	69	67
Path12	68	66
Path12	67	65
Path12	66	64
Path12	65	63
Path12	64	62
Path12	63	61
Path12	62	60
Path12	61	59
Path12	60	58
Path12	59	58
Path12	58	57
Path12	57	56
Path12	56	55
Path12	55	54
Path12	51	51
Path13	5	50
Path13	5	52
Path13	5	54
Path13	6	55
Path13	6	57
Path13	8	57
Path13	9	58
Path13	11	58
Path13	13	58
Path13	15	58
Path13	17	58
Path13	19	58
Path13	21	58
Path13	23	58
Path13	25	58
Path13	27	58
Path13	29	58
Path13	30	57
Path13	32	57
Path13	33	56
Path13	35	56
Path13	36	55
Path13	38	55
Path13	39	54
Path13	40	54
Path13	41	53
Path13	42	53
Path13	44	52
Path13	45	52
Path13	47	51
Path13	50	50
Path14	43	6
Path14	45	6
Path14	47	6
Path14	49	6
Path14	50	7
Path14	50	9
Path14	50	11
Path14	50	13
Path14	52	13
Path14	52	15
Path14	53	16
Path14	53	18
Path14	53	20
Path14	53	22
Path14	53	24
Path14	53	26
Path14	53	28
Path14	53	30
Path14	53	32
Path14	53	34
Path14	53	36
Path14	53	38
Path14	52	39
Path14	52	41
Path14	51	43
Path14	51	45
Path14	50	50
Path15	30	90
Path15	29	89
Path15	28	88
Path15	28	86
Path15	27	85
Path15	26	84
Path15	25	83
Path15	24	82
Path15	23	81
Path15	22	80
Path15	22	78
Path15	22	76
Path15	22	74
Path15	22	72
Path15	22	70
Path15	22	68
Path15	22	66
Path15	22	64
Path15	22	62
Path15	23	61
Path15	24	60
Path15	26	60
Path15	27	59
Path15	28	58
Path15	30	58
Path15	31	57
Path15	32	56
Path15	34	56
Path15	35	55
Path15	37	55
Path15	38	54
Path15	40	54
Path15	41	53
Path15	42	53
Path15	44	52
Path15	45	52
Path15	47	51
Path15	50	50
Path16	86	24
Path16	84	24
Path16	82	24
Path16	81	23
Path16	80	22
Path16	78	22
Path16	76	22
Path16	74	22
Path16	72	22
Path16	70	22
Path16	68	22
Path16	66	22
Path16	64	22
Path16	62	22
Path16	60	22
Path16	58	22
Path16	57	23
Path16	56	24
Path16	56	26
Path16	55	27
Path16	55	29
Path16	55	31
Path16	54	32
Path16	54	34
Path16	53	35
Path16	53	37
Path16	52	38
Path16	52	40
Path16	52	41
Path16	51	43
Path16	51	45
Path16	50	50
Path17	6	43
Path17	6	45
Path17	6	47
Path17	6	49
Path17	6	51
Path17	6	53
Path17	6	55
Path17	6	57
Path17	8	57
Path17	9	58
Path17	11	58
Path17	13	58
Path17	15	58
Path17	17	58
Path17	19	58
Path17	21	58
Path17	23	58
Path17	25	58
Path17	27	58
Path17	29	58
Path17	30	57
Path17	32	57
Path17	33	56
Path17	35	56
Path17	36	55
Path17	38	55
Path17	39	54
Path17	40	54
Path17	41	53
Path17	42	53
Path17	44	52
Path17	45	52
Path17	47	51
Path17	50	50
Path18	64	7
Path18	62	7
Path18	61	8
Path18	61	10
Path18	60	11
Path18	60	13
Path18	60	15
Path18	59	16
Path18	59	18
Path18	58	19
Path18	58	21
Path18	57	22
Path18	56	23
Path18	56	25
Path18	56	27
Path18	55	28
Path18	55	30
Path18	54	31
Path18	54	33
Path18	54	35
Path18	53	36
Path18	53	38
Path18	52	39
Path18	52	41
Path18	51	43
Path18	51	45
Path18	50	50
Path19	43	94
Path19	43	92
Path19	43	90
Path19	43	88
Path19	43	86
Path19	43	84
Path19	43	82
Path19	43	80
Path19	43	78
Path19	43	76
Path19	41	76
Path19	41	74
Path19	39	74
Path19	37	74
Path19	35	74
Path19	35	72
Path19	34	71
Path19	34	69
Path19	34	67
Path19	34	65
Path19	34	63
Path19	34	61
Path19	34	59
Path19	34	57
Path19	35	56
Path19	36	55
Path19	38	55
Path19	39	54
Path19	40	54
Path19	41	53
Path19	42	53
Path19	44	52
Path19	45	52
Path19	47	51
Path19	50	50
Path20	86	76
Path20	84	76
Path20	82	76
Path20	80	76
Path20	79	75
Path20	78	74
Path20	77	73
Path20	76	72
Path20	75	71
Path20	74	70
Path20	73	69
Path20	72	68
Path20	70	68
Path20	69	67
Path20	68	66
Path20	67	65
Path20	66	64
Path20	65	63
Path20	64	62
Path20	63	61
Path20	62	60
Path20	61	59
Path20	60	58
Path20	59	58
Path20	58	57
Path20	57	56
Path20	56	55
Path20	55	54
Path20	51	51
Path21	76	14
Path21	74	14
Path21	72	14
Path21	70	14
Path21	68	14
Path21	66	14
Path21	64	14
Path21	62	14
Path21	60	14
Path21	59	15
Path21	59	17
Path21	58	18
Path21	58	20
Path21	58	22
Path21	57	23
Path21	56	24
Path21	56	26
Path21	55	27
Path21	55	29
Path21	55	31
Path21	54	32
Path21	54	34
Path21	53	35
Path21	53	37
Path21	52	38
Path21	52	40
Path21	52	41
Path21	51	43
Path21	51	45
Path21	50	50
Path22	93	36
Path22	91	36
Path22	89	36
Path22	87	36
Path22	85	36
Path22	83	36
Path22	81	36
Path22	79	36
Path22	77	36
Path22	75	36
Path22	74	35
Path22	72	35
Path22	71	34
Path22	69	34
Path22	67	34
Path22	65	34
Path22	63	34
Path22	61	34
Path22	59	34
Path22	57	34
Path22	55	34
Path22	54	35
Path22	53	36
Path22	53	38
Path22	52	39
Path22	52	41
Path22	51	43
Path22	51	45
Path22	50	50
Path23	82	18
Path23	80	18
Path23	78	18
Path23	76	18
Path23	74	18
Path23	72	18
Path23	70	18
Path23	68	18
Path23	66	18
Path23	64	18
Path23	62	18
Path23	60	18
Path23	58	18
Path23	58	20
Path23	58	22
Path23	57	23
Path23	56	24
Path23	56	26
Path23	55	27
Path23	55	29
Path23	55	31
Path23	54	32
Path23	54	34
Path23	53	35
Path23	53	37
Path23	52	38
Path23	52	40
Path23	52	41
Path23	51	43
Path23	51	45
Path23	50	50
Path24	6	57
Path24	8	57
Path24	9	58
Path24	11	58
Path24	13	58
Path24	15	58
Path24	17	58
Path24	19	58
Path24	21	58
Path24	23	58
Path24	25	58
Path24	27	58
Path24	29	58
Path24	30	57
Path24	32	57
Path24	33	56
Path24	35	56
Path24	36	55
Path24	38	55
Path24	39	54
Path24	40	54
Path24	41	53
Path24	42	53
Path24	44	52
Path24	45	52
Path24	47	51
Path24	50	50
Path25	93	64
Path25	93	66
Path25	92	67
Path25	90	67
Path25	88	67
Path25	86	67
Path25	84	67
Path25	82	67
Path25	80	67
Path25	78	67
Path25	76	67
Path25	74	67
Path25	72	67
Path25	70	67
Path25	69	66
Path25	68	65
Path25	67	64
Path25	66	63
Path25	64	63
Path25	63	62
Path25	62	61
Path25	61	60
Path25	60	59
Path25	59	58
Path25	58	57
Path25	57	56
Path25	56	55
Path25	55	54
Path25	51	51
Path26	94	57
Path26	94	59
Path26	94	61
Path26	94	63
Path26	93	64
Path26	93	66
Path26	92	67
Path26	90	67
Path26	88	67
Path26	86	67
Path26	84	67
Path26	82	67
Path26	80	67
Path26	78	67
Path26	76	67
Path26	74	67
Path26	72	67
Path26	70	67
Path26	69	66
Path26	68	65
Path26	67	64
Path26	66	63
Path26	64	63
Path26	63	62
Path26	62	61
Path26	61	60
Path26	60	59
Path26	59	58
Path26	58	57
Path26	57	56
Path26	56	55
Path26	55	54
Path26	51	51
Path27	14	24
Path27	14	26
Path27	14	28
Path27	14	30
Path27	14	32
Path27	14	34
Path27	14	36
Path27	14	38
Path27	14	40
Path27	14	42
Path27	14	44
Path27	14	46
Path27	14	48
Path27	14	50
Path27	14	52
Path27	14	54
Path27	15	55
Path27	16	56
Path27	18	56
Path27	20	56
Path27	22	56
Path27	23	57
Path27	25	57
Path27	27	57
Path27	29	57
Path27	31	57
Path27	32	56
Path27	34	56
Path27	35	55
Path27	37	55
Path27	38	54
Path27	40	54
Path27	41	53
Path27	42	53
Path27	44	52
Path27	45	52
Path27	47	51
Path27	50	50
Path28	57	94
Path28	59	94
Path28	61	94
Path28	63	94
Path28	64	93
Path28	66	93
Path28	67	92
Path28	67	90
Path28	67	88
Path28	67	86
Path28	68	85
Path28	69	84
Path28	70	83
Path28	71	82
Path28	71	80
Path28	71	78
Path28	71	76
Path28	71	74
Path28	71	72
Path28	71	70
Path28	71	68
Path28	70	67
Path28	69	66
Path28	68	65
Path28	67	64
Path28	66	63
Path28	64	63
Path28	63	62
Path28	62	61
Path28	61	60
Path28	60	59
Path28	59	58
Path28	58	57
Path28	57	56
Path28	56	55
Path28	55	54
Path28	51	51
Path29	36	93
Path29	36	91
Path29	36	89
Path29	36	87
Path29	36	85
Path29	36	83
Path29	36	81
Path29	34	81
Path29	32	81
Path29	31	80
Path29	31	78
Path29	31	76
Path29	31	74
Path29	30	73
Path29	30	71
Path29	30	69
Path29	30	67
Path29	30	65
Path29	30	63
Path29	30	61
Path29	30	59
Path29	30	57
Path29	32	57
Path29	33	56
Path29	35	56
Path29	36	55
Path29	38	55
Path29	39	54
Path29	40	54
Path29	41	53
Path29	42	53
Path29	44	52
Path29	45	52
Path29	47	51
Path29	50	50
Path30	18	18
Path30	20	18
Path30	22	18
Path30	24	18
Path30	26	18
Path30	28	18
Path30	30	18
Path30	32	18
Path30	34	18
Path30	36	18
Path30	38	18
Path30	40	18
Path30	42	18
Path30	44	18
Path30	46	18
Path30	48	18
Path30	50	18
Path30	52	18
Path30	53	19
Path30	53	21
Path30	53	23
Path30	53	25
Path30	53	27
Path30	53	29
Path30	53	31
Path30	53	33
Path30	53	35
Path30	53	37
Path30	52	38
Path30	52	40
Path30	52	41
Path30	51	43
Path30	51	45
Path30	50	50
Path31	50	5
Path31	50	7
Path31	50	9
Path31	50	11
Path31	50	13
Path31	52	13
Path31	52	15
Path31	53	16
Path31	53	18
Path31	53	20
Path31	53	22
Path31	53	24
Path31	53	26
Path31	53	28
Path31	53	30
Path31	53	32
Path31	53	34
Path31	53	36
Path31	53	38
Path31	52	39
Path31	52	41
Path31	51	43
Path31	51	45
Path31	50	50
Path32	30	10
Path32	32	10
Path32	34	10
Path32	36	10
Path32	38	10
Path32	40	10
Path32	42	10
Path32	44	10
Path32	46	10
Path32	48	10
Path32	50	10
Path32	50	12
Path32	52	12
Path32	52	14
Path32	52	16
Path32	53	17
Path32	53	19
Path32	53	21
Path32	53	23
Path32	53	25
Path32	53	27
Path32	53	29
Path32	53	31
Path32	53	33
Path32	53	35
Path32	53	37
Path32	52	38
Path32	52	40
Path32	52	41
Path32	51	43
Path32	51	45
Path32	50	50
Path33	10	30
Path33	10	32
Path33	10	34
Path33	10	36
Path33	10	38
Path33	10	40
Path33	10	42
Path33	10	44
Path33	10	46
Path33	10	48
Path33	10	50
Path33	10	52
Path33	10	54
Path33	11	55
Path33	11	57
Path33	13	57
Path33	15	57
Path33	16	58
Path33	18	58
Path33	20	58
Path33	22	58
Path33	24	58
Path33	26	58
Path33	28	58
Path33	30	58
Path33	31	57
Path33	32	56
Path33	34	56
Path33	35	55
Path33	37	55
Path33	38	54
Path33	40	54
Path33	41	53
Path33	42	53
Path33	44	52
Path33	45	52
Path33	47	51
Path33	50	50
Path34	82	82
Path34	82	80
Path34	82	78
Path34	81	77
Path34	80	76
Path34	79	75
Path34	78	74
Path34	77	73
Path34	76	72
Path34	75	71
Path34	74	70
Path34	73	69
Path34	72	68
Path34	70	68
Path34	69	67
Path34	68	66
Path34	67	65
Path34	66	64
Path34	65	63
Path34	64	62
Path34	63	61
Path34	62	60
Path34	61	59
Path34	60	58
Path34	59	58
Path34	58	57
Path34	57	56
Path34	56	55
Path34	55	54
Path34	51	51
Path35	64	93
Path35	66	93
Path35	67	92
Path35	67	90
Path35	67	88
Path35	67	86
Path35	68	85
Path35	69	84
Path35	70	83
Path35	71	82
Path35	71	80
Path35	71	78
Path35	71	76
Path35	71	74
Path35	71	72
Path35	71	70
Path35	71	68
Path35	70	67
Path35	69	66
Path35	68	65
Path35	67	64
Path35	66	63
Path35	64	63
Path35	63	62
Path35	62	61
Path35	61	60
Path35	60	59
Path35	59	58
Path35	58	57
Path35	57	56
Path35	56	55
Path35	55	54
Path35	51	51
Path36	14	76
Path36	14	74
Path36	14	72
Path36	14	70
Path36	14	68
Path36	14	66
Path36	14	64
Path36	16	64
Path36	17	63
Path36	19	63
Path36	20	62
Path36	21	61
Path36	23	61
Path36	24	60
Path36	26	60
Path36	27	59
Path36	28	58
Path36	30	58
Path36	31	57
Path36	32	56
Path36	34	56
Path36	35	55
Path36	37	55
Path36	38	54
Path36	40	54
Path36	41	53
Path36	42	53
Path36	44	52
Path36	45	52
Path36	47	51
Path36	50	50
Path37	36	7
Path37	38	7
Path37	40	7
Path37	42	7
Path37	44	7
Path37	46	7
Path37	48	7
Path37	50	7
Path37	50	9
Path37	50	11
Path37	50	13
Path37	52	13
Path37	52	15
Path37	53	16
Path37	53	18
Path37	53	20
Path37	53	22
Path37	53	24
Path37	53	26
Path37	53	28
Path37	53	30
Path37	53	32
Path37	53	34
Path37	53	36
Path37	53	38
Path37	52	39
Path37	52	41
Path37	51	43
Path37	51	45
Path37	50	50
Path38	7	36
Path38	7	38
Path38	7	40
Path38	7	42
Path38	7	44
Path38	7	46
Path38	7	48
Path38	7	50
Path38	7	52
Path38	7	54
Path38	8	55
Path38	10	55
Path38	12	55
Path38	13	56
Path38	14	57
Path38	16	57
Path38	18	57
Path38	20	57
Path38	22	57
Path38	24	57
Path38	26	57
Path38	28	57
Path38	30	57
Path38	32	57
Path38	33	56
Path38	35	56
Path38	36	55
Path38	38	55
Path38	39	54
Path38	40	54
Path38	41	53
Path38	42	53
Path38	44	52
Path38	45	52
Path38	47	51
Path38	50	50
Path39	24	14
Path39	26	14
Path39	28	14
Path39	30	14
Path39	32	14
Path39	34	14
Path39	36	14
Path39	38	14
Path39	40	14
Path39	42	14
Path39	44	14
Path39	46	14
Path39	48	14
Path39	50	14
Path39	52	14
Path39	52	16
Path39	53	17
Path39	53	19
Path39	53	21
Path39	53	23
Path39	53	25
Path39	53	27
Path39	53	29
Path39	53	31
Path39	53	33
Path39	53	35
Path39	53	37
Path39	52	38
Path39	52	40
Path39	52	41
Path39	51	43
Path39	51	45
Path39	50	50
