# Supplementary material for: Spatially periodic computation in the entorhinal-hippocampal circuit during navigation
Source: eLife. 2026 Feb 17;14:RP107517. doi: 10.7554/eLife.107517 (PMC12912724; doi:10.7554/eLife.107517)
Supplement: Figure 6—source data 2. [file elife-107517-fig6-data2.xlsx]

## Sheet: Sheet1
Figure 6-source data 2
Related to Figure 6D
Each row corresponds to a random goal location, and each column represents #-fold modulation.
69.187	3.8422	393.248	106.254	2.78498	0.357102	31.5148	0.758719	0.529431
13.1691	252.476	13.4994	52.4062	42.2465	40.4498	47.8487	21.308	7.81837
6.29633	20.2657	327.007	60.9361	6.24129	0.990711	7.52669	0.258312	3.21046
10.229	120.256	252.281	19.4974	5.965	15.4246	2.03358	1.56609	2.20194
35.0734	66.7826	56.8523	170.912	107.587	39.089	25.2986	13.2774	0.842751
37.7179	65.6329	71.0496	125.212	119.307	5.19872	2.89946	6.49039	3.08781
5.08977	48.6089	332.842	54.582	6.59445	4.26017	6.09511	1.95599	2.8468
8.22673	4.57734	311.543	68.2426	16.8306	2.12276	3.60102	3.48087	1.31629
8.81726	186.816	207.798	28.1002	33.2637	7.54826	0.793092	0.396377	1.25755
32.8815	140.789	129.973	110.118	65.4329	16.078	5.67091	8.04524	0.280727
83.5317	108.718	41.7426	119.296	162.883	30.5025	8.28525	9.31685	6.92586
69.132	207.648	225.609	68.5644	2.75939	17.3456	7.79263	8.5702	0.0483752
52.1036	202.709	29.6025	73.0349	64.1578	87.8054	45.5003	13.7616	6.22499
76.5945	2.93008	388.833	49.4003	2.2924	2.36423	18.303	7.16708	0.0314831
8.71047	102.466	176.528	117.592	5.67886	29.5082	1.83503	0.0840778	2.53448
63.2451	55.8791	341.21	80.2344	0.791347	14.4641	4.75176	1.61276	1.90301
10.9294	204.251	192.162	36.2305	1.35559	13.1128	6.87611	6.53023	0.454119
34.5323	20.3114	372.647	44.9671	8.14243	1.44716	10.468	5.83042	4.45817
68.9231	16.71	327.561	122.75	7.4665	10.0653	14.3291	4.681	1.65641
27.7528	182.614	77.4057	106.869	83.5509	54.6003	30.9882	1.78051	2.84345
2.27152	185.885	72.7852	146.205	11.3669	41.3472	19.8168	2.57318	8.68889
6.01088	173.005	112.64	118.811	17.7536	32.569	4.9013	6.4806	0.97549
11.1662	11.1443	384.956	54.4675	7.08141	1.43033	11.1121	2.94994	0.637323
3.27327	173.54	101.547	141.616	5.90029	36.0856	11.5016	2.42475	2.14637
19.6383	95.9508	38.1687	94.899	51.0094	56.8124	63.4764	25.6506	3.93908
13.4271	156.574	291.569	38.4496	20.7163	10.084	4.8193	2.22704	2.95999
52.8168	219.137	178.273	57.713	59.5869	11.8161	4.87575	4.59856	10.1512
23.0048	50.6104	103.649	101.707	89.2688	17.8386	2.6148	0.521944	2.13923
19.7264	131.144	34.4208	114.949	31.8678	72.1342	34.4994	17.5573	10.2066
9.09765	141.605	222.44	65.6109	35.1125	10.3272	1.21305	0.0831874	1.68453
9.3659	104.769	188.037	112.973	39.2993	3.72261	1.91228	2.88787	4.69488
32.5263	80.2422	308.033	72.5949	29.1016	0.46758	5.50717	9.30253	8.41041
73.1385	67.9513	413.921	14.2039	5.73046	21.219	0.146904	7.80044	6.02761
23.5673	189.689	26.5722	60.3229	90.2043	67.6359	35.5863	10.5105	4.70336
65.5886	39.7534	208.787	151.865	36.1329	10.4839	7.5876	3.05725	2.52516
24.4974	63.7377	172.471	154.224	29.0244	50.8892	0.561136	0.923298	10.0482
23.9398	124.51	128.149	143.12	23.3243	43.6054	5.23184	4.79794	2.22882
47.4066	38.0905	388.964	25.7544	1.04031	9.59767	0.39439	6.72858	2.15131
12.4841	233.989	141.808	35.8092	34.7413	0.62743	1.38089	3.85264	0.261368
65.022	49.7881	395.334	23.9811	4.47698	15.4267	0.783436	0.0814061	4.78499
6.48288	112.187	251.279	58.0185	11.3848	8.8923	0.254972	0.111819	2.41955
18.2696	139.377	239.397	18.3626	15.4656	7.53347	0.694364	0.0761758	1.55029
14.3577	149.406	200.025	40.4404	24.8398	4.22962	1.70585	0.44252	2.23389
25.2861	25.1027	175.801	174.955	74.9378	3.83849	8.75427	9.15852	0.64578
4.54551	148.94	195.461	54.4483	41.8874	0.284325	1.73387	0.661696	0.0412195
9.27197	74.1003	238.345	98.3905	1.83127	18.8632	0.129504	0.401021	3.45195
71.5253	38.4643	435.758	26.1933	7.28048	12.2665	5.95891	6.21481	7.13405
10.1322	127.805	235.551	58.1273	18.2777	11.1969	0.0173899	0.0111886	2.68087
14.7102	46.5795	396.513	0.10257	0.804907	8.92591	2.33795	5.89311	0.682943
42.6444	178.75	142.784	68.4214	102.539	9.743	7.36512	5.81236	1.12529
12.0815	46.6241	290.549	75.1915	14.7522	6.21081	7.04919	8.27654	0.312939
24.5847	235.926	29.5819	74.0867	36.1366	58.8451	40.0008	21.6114	2.22231
49.3544	20.4753	301.819	139.786	3.76437	6.80652	19.9747	0.655505	0.50862
77.0873	12.1096	262.718	169.42	10.7165	18.6727	9.293	1.78011	4.69177
5.78659	134.858	111.016	126.243	34.2003	12.7164	6.65568	2.77206	0.324197
10.8763	11.1021	289.418	81.1987	11.3058	1.82826	6.93805	0.675624	0.390109
12.7433	65.079	328.556	11.5947	2.03248	6.74631	1.06075	6.15044	0.499009
2.28278	132.849	134.229	121.477	29.6727	9.42453	5.51089	2.75361	0.368135
15.963	166.773	193.75	38.3669	34.0328	2.59503	1.0249	0.0823557	1.08725
30.7695	79.2008	184.525	159.275	14.2634	41.3969	0.380353	0.100389	5.00628
54.3548	137.76	221.915	79.3622	66.5722	4.01123	1.61105	14.2148	6.1757
13.6972	55.946	364.923	11.4375	2.17938	6.98138	3.64121	2.8152	1.28797
60.7528	23.4903	365.474	75.9696	11.6434	2.71621	16.871	9.17523	0.516314
20.4142	134.587	292.32	28.8009	19.7442	6.98492	0.322155	0.107389	3.93459
21.1045	41.6947	382.371	3.09797	1.58564	15.1472	3.22732	5.82997	2.02324
54.864	229.429	78.7639	90.7606	73.578	22.1528	11.3932	2.01513	5.45416
27.9574	156.931	100.45	99.8484	54.9026	61.9681	21.7168	0.369402	4.09899
33.9063	161.62	236.891	62.0159	31.2879	7.92148	1.2578	2.1248	8.47286
16.6736	64.6337	103.598	112.99	77.6732	21.8515	2.04654	1.30396	1.24428
28.6453	90.1242	238.723	99.8266	40.6683	7.18792	4.07452	11.9529	1.85541
45.0637	144.618	104.308	104.034	56.788	6.54934	3.32671	0.257471	4.71561
21.314	54.7785	86.6635	172.539	78.7318	30.4968	18.9202	7.48156	1.4756
8.42085	45.5624	344.846	42.0116	1.09121	9.42388	3.714	1.47826	1.44774
7.25666	218.54	205.006	50.711	1.59117	10.8366	7.00521	4.7069	0.920859
9.94263	113.323	65.7779	110.386	89.5962	13.2934	3.99877	7.2857	2.21994
56.8884	66.4236	199.285	153.617	24.3469	49.5204	2.04035	0.340107	9.24353
6.63371	166.143	184.895	64.3223	30.5105	7.21699	0.783695	0.252959	0.537328
41.4522	165.998	50.0476	117.819	74.5964	84.9639	26.5585	1.47232	2.63343
63.3628	21.4791	301.923	151.124	5.23038	14.6084	11.4958	2.29273	0.654803
1.70159	170.188	111.303	123.08	8.8455	21.4642	6.32554	1.75839	1.38332
10.227	25.4742	230.226	125.482	29.7401	18.3625	0.23145	5.28446	1.88716
17.7634	215.173	162.279	55.2607	19.7917	8.17176	4.14672	0.218362	1.112
22.4976	62.4394	338.682	5.17632	0.299413	11.4443	0.129674	7.5346	0.862355
52.1883	25.7172	435.2	9.70621	1.29846	13.5036	7.14916	7.91037	2.42963
61.2361	61.203	351.848	55.283	23.0331	4.22255	2.85642	4.41765	15.0705
50.1063	187.542	191.99	93.7582	76.5578	3.5535	1.13531	9.24381	5.67933
7.75774	174.824	59.0659	83.1524	59.5861	16.8544	13.6582	3.70256	0.903973
4.7253	139.528	142.387	130.111	22.7173	12.6246	5.32986	1.70204	0.0651918
25.2946	295.186	43.7737	46.8129	98.6545	38.595	41.4333	7.13354	6.72205
38.9512	155.385	147.153	111.132	46.4231	42.7732	10.6672	3.64897	3.77427
22.2884	44.7128	344.134	55.9817	15.167	0.992701	13.3076	6.63804	2.02351
62.8666	104.204	96.7564	169.142	33.1798	72.3212	15.2123	12.8522	2.15275
71.1538	2.20326	450.417	31.7189	2.08643	5.23124	18.8125	3.79636	4.67174
68.8033	36.4474	155.735	211.049	78.8396	14.4417	8.45209	10.7547	1.31235
20.7706	124.387	23.4986	98.5019	94.1809	61.8202	34.4259	5.10424	1.13687
14.0015	34.1177	178.865	122.049	57.3952	21.7023	0.333161	4.60575	4.81453
42.6593	202.636	143.201	86.2356	83.2192	7.5668	1.28939	9.51707	5.71534
4.68862	163.333	110.571	112.997	26.8875	13.1506	4.73964	3.76102	0.73277
41.8683	190.825	18.9789	64.4587	104.365	69.6591	31.4852	4.41693	1.709
70.7661	80.8208	19.4519	114.229	142.873	37.1177	22.9065	14.6717	1.34252
